# Supplementary material
Source: publisher figshare collection journal article supplement (https://geolsoc.figshare.com/ndownloader/files/28842967)
Supplement: Supplementary file 1 [file 28842967]

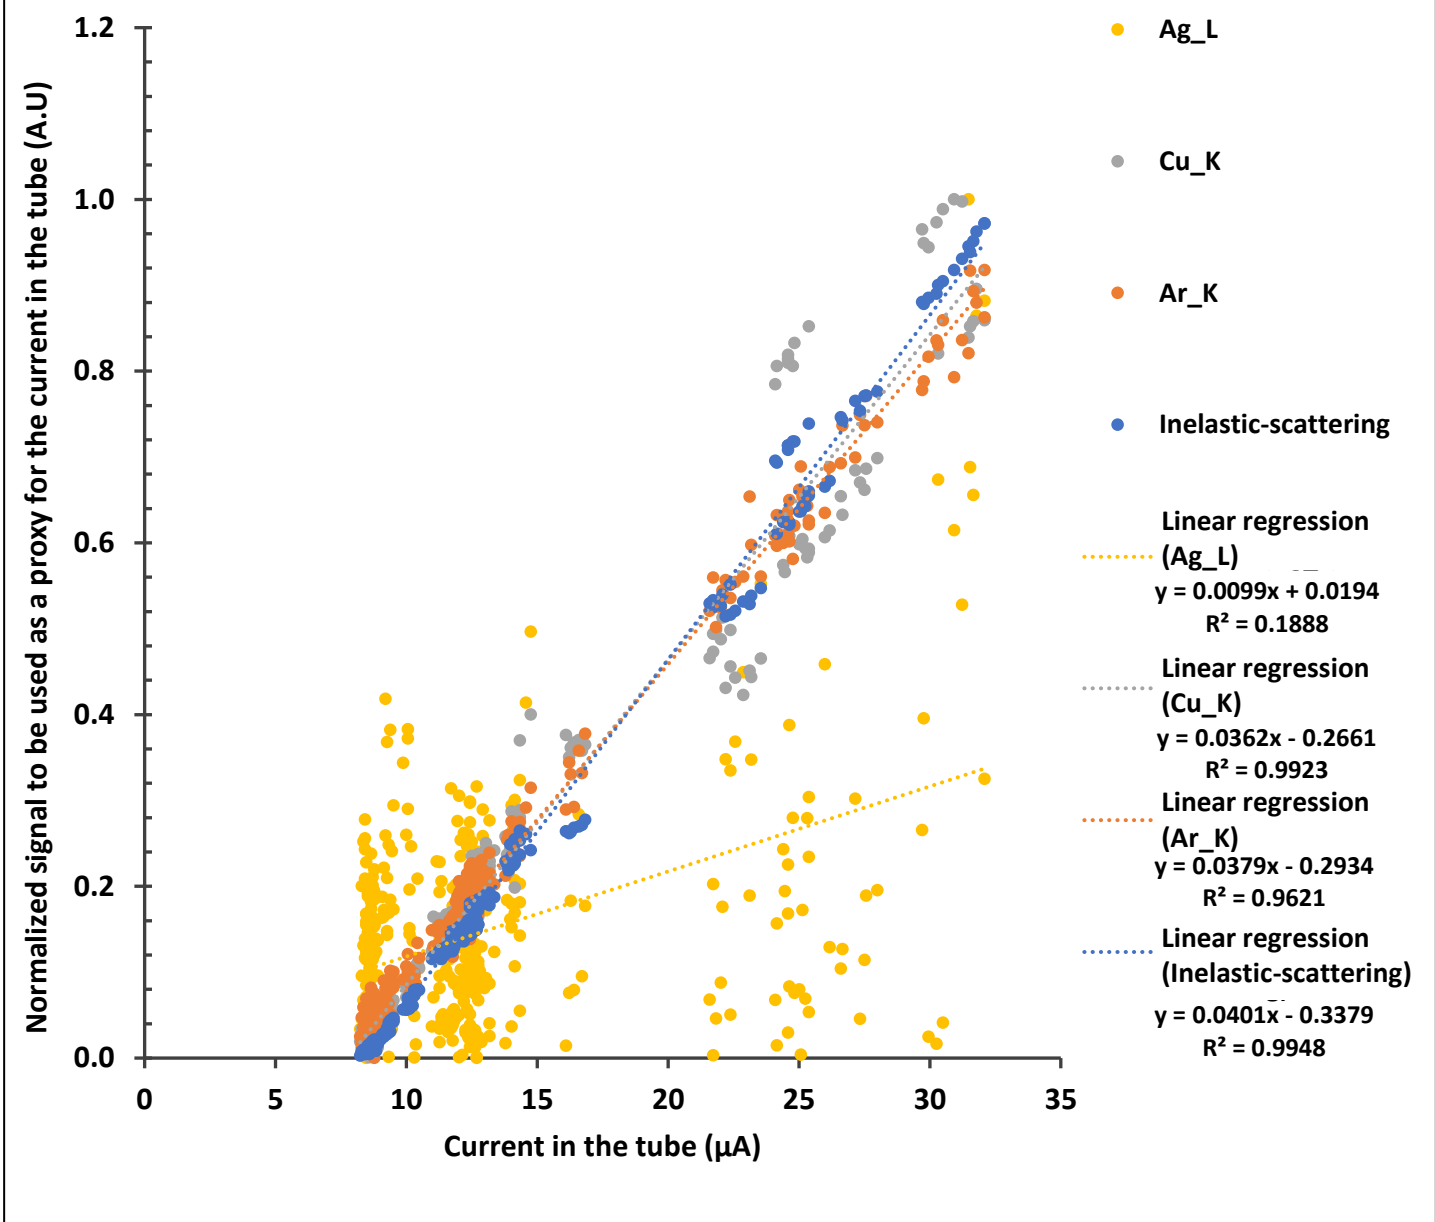

**Figure C: Estimation of the tube current using several types of signal normalisation: Ag in L electron shell, Cu in K electron shell, Ar in K electron shell and inelastic-scattering. These can be used as proxies for the current in the tube.**
